# Supplementary material for: Structural basis of ubiquitin‐independent PP1 complex disassembly by p97
Source: PubMed Central journal article supplement (PMC10350818; doi:10.15252/embj.2022113110), 2023-06-02
Supplement: EMBJ-42-e113110-s001.pdf [file EMBJ-42-e113110-s001.pdf]

# Appendix

## **Structural basis of ubiquitin-independent PP1 complex disassembly by p97**

Johannes van den Boom<sup>1</sup>, Guendalina Marini<sup>2</sup>, Hemmo Meyer<sup>1,\*</sup>, Helen Saibil<sup>3,\*</sup>

<sup>1</sup>Molecular Biology I, Center of Medical Biotechnology, Faculty of Biology, University of Duisburg-Essen, Germany

<sup>2</sup>Centre for Structural Systems Biology, Leibniz-Institute of Virology and University Medical Center Hamburg-Eppendorf (UKE), Hamburg, Germany

<sup>3</sup>Biological Sciences, Institute of Structural and Molecular Biology, Birkbeck University of London, UK

\*correspondence:

[h.saibil@bbk.ac.uk](mailto:h.saibil@bbk.ac.uk)

[hemmo.meyer@uni-due.de](mailto:hemmo.meyer@uni-due.de)

## Table of contents

|                               |          |
|-------------------------------|----------|
| <b>Appendix Figures .....</b> | <b>3</b> |
| Appendix Fig. S1 .....        | 3        |
| Appendix Fig. S2.....         | 4        |

## Appendix Figures

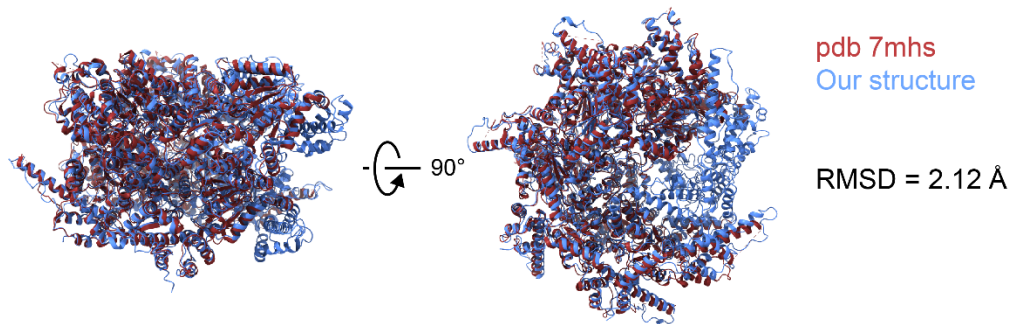

### Appendix Figure S1.

Overlay of the aligned atomic models of p97 from our structure and the previously published model (pdb 7mhs; Xu et al. 2022). The two models show high similarity (RMSD = 2.12 Å). N-domains were removed, as coordinates for N-domains and F subunit of the previous structure were not deposited.

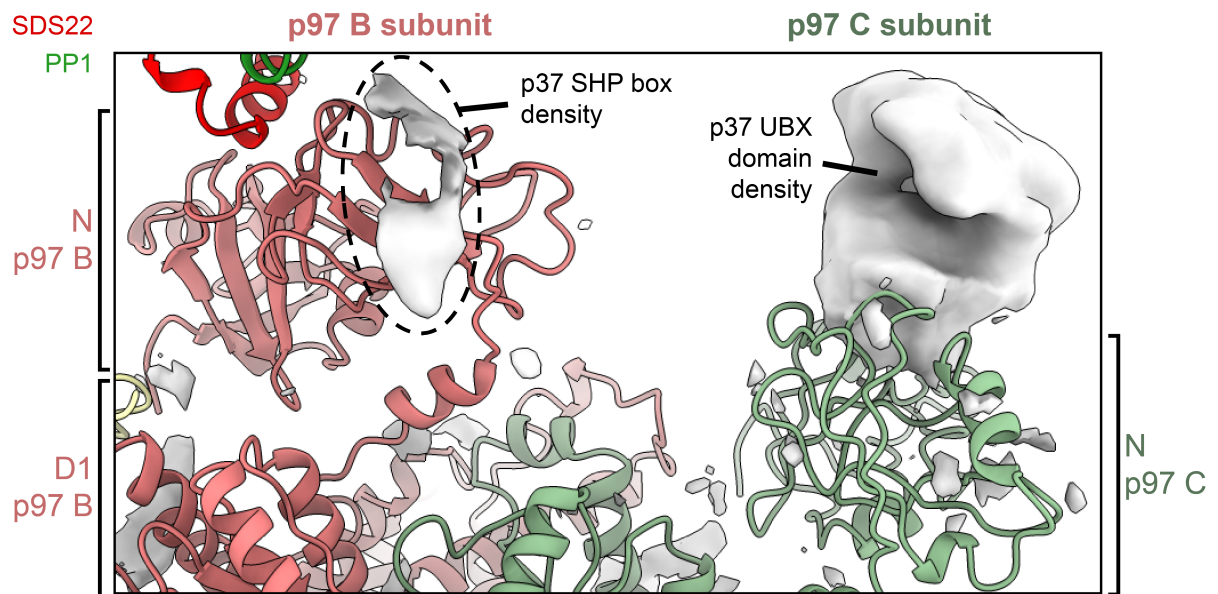

### Appendix Figure S2.

Density of p97 and SPI was subtracted from the map to show the additional density (gray) on p97 N-domains of subunits B (left) and C (right) corresponding to the p37 adapter. The additional density on the B subunits corresponds to the SHP box of p37, while the additional density on the C subunit corresponds to the UBX domain of p37. Density threshold of the map is 0.0024.
